# Supplementary material for: Exploring the Marginal Effects of Climate Change on Farming System Choice: A Farm-Level Space-for-Time Approach
Source: Preprints.org preprint supplement (doi:10.20944/preprints202309.1628.v1), 2023-09-25
Supplement: Supplementary file 2 [file supplementary]

Supplementary information

for

Exploring the marginal effects of climate change on farming system choice: a farm-level space-for-time approach

Paulo Flores Ribeiro, José Lima Santos

The next pages present transition matrices for areal changes of farming systems from 2017 to 2081-2100 in three climate change scenarios in the Alentejo region, Portugal:

- Low emission scenario (SSP 1-2.6)
- Moderate emission scenario (SSP 3-7.0)
- High emission scenario (SSP 5-8.5)

Values are presented in relative terms (proportions)

Values below 0.01 are omitted

**Low emission scenario (SSP 1-2.6)**

To

From

**Moderate emission scenario (SSP 3-7.0)**

To

From

**High emission scenario (SSP 5-8.5)**

From

To
